# Supplementary material for: Preoperative Metabolic Tumor Volume2.5 Associated with Early Systemic Metastasis in Resected Pancreatic Cancer: A Transcriptome-Wide Analysis
Source: PubMed Central journal article supplement — Gut Liver. 2019 Mar 15;13(3):356–65. doi: 10.5009/gnl18242 (PMC6529162; doi:10.5009/gnl18242), 2019-03-15
Supplement: gnl-13-356_Suppl.pdf [file gnl-13-356_Suppl.pdf]

**Supplementary Table 1.** List of Upregulated Genes in the MTV High Group Compared to the MTV Low Group (fold change >1.5 and p<0.05)

| Gene name (symbol) | Gene bank Accession | Description                                                         | Fold change | p-value |
|--------------------|---------------------|---------------------------------------------------------------------|-------------|---------|
| H19                | BF569051            | H19, imprinted maternally expressed transcript (non-protein coding) | 6.136       | 0.044   |
| TMC8               | AI370364            | transmembrane channel-like 8                                        | 1.941       | 0.033   |
| SPRR1A             | NM_005987           | small proline-rich protein 1A                                       | 1.887       | 0.046   |
| GJB2               | M86849              | gap junction protein, beta 2, 26kDa                                 | 1.838       | 0.047   |
| PKP1               | NM_000299           | plakophilin 1 (ectodermal dysplasia/skin fragility syndrome)        | 1.757       | 0.023   |
| SP3                | AW470841            | Sp3 transcription factor                                            | 1.71        | 0.023   |
| HIST1H4L           | NM_003546           | histone cluster 1, H4l                                              | 1.589       | 0.008   |
| SNPH               | NM_014723           | syntaphilin                                                         | 1.588       | 0.044   |
| MMP28              | BC002631            | matrix metalloproteinase 28                                         | 1.58        | 0.043   |
| KYNU               | BC000879            | kynureninase (L-kynurenine hydrolase)                               | 1.564       | 0.007   |
| APOL1              | AF323540            | apolipoprotein L, 1                                                 | 1.56        | 0.012   |
| PYCR2              | AL561868            | pyrroline-5-carboxylate reductase family, member 2                  | 1.559       | 0.037   |
| TNK2               | AI146308            | tyrosine kinase, non-receptor, 2                                    | 1.554       | 0.049   |
| METTL8             | BC025250            | methyltransferase like 8                                            | 1.517       | 0.001   |

MTV, metabolic tumor volume.

**Supplementary Table 2.** List of Downregulated Genes in the MTV High Group Compared to the MTV Low Group

| Gene name (symbol) | Gene bank Accession | Description                                                                         | Fold change | p-value |
|--------------------|---------------------|-------------------------------------------------------------------------------------|-------------|---------|
| C6orf58            | AI857688            | chromosome 6 open reading frame 58                                                  | 0.048       | 0.002   |
| ACTG2              | NM_001615           | actin, gamma 2, smooth muscle, enteric                                              | 0.079       | 0.005   |
| TFF2               | NM_005423           | trefoil factor 2                                                                    | 0.11        | 0.015   |
| LYZ                | AV711904            | lysozyme (renal amyloidosis)                                                        | 0.114       | 0.011   |
| MYH11              | S67238              | myosin, heavy chain 11, smooth muscle                                               | 0.141       | 0.012   |
| PGC                | NM_002630           | progastricsin (pepsinogen C)                                                        | 0.153       | 0.024   |
| AGR2               | AF088867            | anterior gradient homolog 2 ( <i>Xenopus laevis</i> )                               | 0.157       | 0.008   |
| MYH11              | NM_022870           | myosin, heavy chain 11, smooth muscle                                               | 0.166       | 0.01    |
| PGC                | BC042578            | progastricsin (pepsinogen C)                                                        | 0.19        | 0.033   |
| MYH11              | AI889739            | myosin, heavy chain 11, smooth muscle                                               | 0.196       | 0.011   |
| LYZ                | U25677              | lysozyme (renal amyloidosis)                                                        | 0.209       | 0.01    |
| DES                | NM_001927           | desmin                                                                              | 0.21        | 0.008   |
| PDK4               | AV707102            | pyruvate dehydrogenase kinase, isozyme 4                                            | 0.239       | 0.046   |
| SYNM               | AK026420            | synemin, intermediate filament protein                                              | 0.248       | 0.008   |
| MUC6               | AI611214            | similar to Mucin-6 precursor (Gastric mucin-6)                                      | 0.252       | 0.009   |
| ELN                | AA479278            | elastin                                                                             | 0.259       | 0.021   |
| MYLK               | NM_005965           | myosin light chain kinase                                                           | 0.345       | 0.031   |
| MUC3A              | AF113616            | mucin 3A, cell surface associated                                                   | 0.357       | 0.03    |
| SYNPO2             | AL552450            | synaptopodin 2                                                                      | 0.363       | 0.039   |
| MFAP4              | R72286              | microfibrillar-associated protein 4                                                 | 0.365       | 0.027   |
| KCNE3              | AF302494            | potassium voltage-gated channel, Isk-related family, member 3                       | 0.413       | 0.03    |
| FXVD6              | NM_022003           | FXVD domain containing ion transport regulator 6                                    | 0.422       | 0.002   |
| KCNE3              | AI692703            | potassium voltage-gated channel, Isk-related family, member 3                       | 0.486       | 0.024   |
| FOXF1              | NM_001451           | forkhead box F1                                                                     | 0.504       | 0.022   |
| TST                | D87292              | thiosulfate sulfurtransferase (rhodanese)                                           | 0.504       | 0.029   |
| DPT                | AI146848            | dermatopontin                                                                       | 0.507       | 0.004   |
| TSC22D3            | AL110191            | TSC22 domain family, member 3                                                       | 0.516       | 0.026   |
| PCDHGA1            | AF152318            | protocadherin gamma subfamily A, 1                                                  | 0.537       | 0.034   |
| NFKBIA             | AI078167            | nuclear factor of kappa light polypeptide gene enhancer in B-cells inhibitor, alpha | 0.544       | 0.039   |
| ALOX5AP            | NM_001629           | arachidonate 5-lipoxygenase-activating protein                                      | 0.55        | 0.022   |
| MLPH               | NM_024101           | melanophilin                                                                        | 0.556       | 0.023   |
| VAPA               | AF154847            | VAMP (vesicle-associated membrane protein)-associated protein A, 33kDa              | 0.558       | 0.049   |
| PLN                | M60411              | phospholamban                                                                       | 0.558       | 0.032   |
| DUSP3              | AL048503            | dual specificity phosphatase 3                                                      | 0.56        | 0.044   |
| CMBL               | AA209487            | carboxymethylenebutenolidase homolog ( <i>Pseudomonas</i> )                         | 0.564       | 0.034   |
| ZNF592             | NM_014630           | zinc finger protein 592                                                             | 0.564       | 0.011   |
| SYNPO2             | AI634580            | synaptopodin 2                                                                      | 0.573       | 0.046   |
| HIPK2              | R37104              | homeodomain interacting protein kinase 2                                            | 0.583       | 0.036   |
| TMED4              | AK074557            | transmembrane emp24 protein transport domain containing 4                           | 0.586       | 0.032   |
| RASSF5             | BC004270            | Ras association (RalGDS/AF-6) domain family member 5                                | 0.587       | 0.043   |
| LY6E               | NM_002346           | lymphocyte antigen 6 complex, locus E                                               | 0.592       | 0.014   |
| GNA11              | M69013              | guanine nucleotide binding protein (G protein), alpha 11 (Gq class)                 | 0.596       | 0.018   |
| CPT1A              | NM_001876           | carnitine palmitoyltransferase 1A (liver)                                           | 0.611       | 0.009   |

**Supplementary Table 2.** Continued

| Gene name<br>(symbol) | Gene bank<br>Accession | Description                                                                 | Fold change | p-value |
|-----------------------|------------------------|-----------------------------------------------------------------------------|-------------|---------|
| UTRN                  | N66570                 | utrophin                                                                    | 0.616       | 0.038   |
| TMEM50B               | N51405                 | transmembrane protein 50B                                                   | 0.622       | 0.036   |
| CRELD1                | NM_015513              | cysteine-rich with EGF-like domains 1                                       | 0.623       | 0.013   |
| MAN2C1                | NM_006715              | mannosidase, alpha, class 2C, member 1                                      | 0.624       | 0.013   |
| CNOT6L                | AW514857               | CCR4-NOT transcription complex, subunit 6-like                              | 0.625       | 0.044   |
| ELL2                  | AI924426               | elongation factor, RNA polymerase II, 2                                     | 0.626       | 0.042   |
| ETS2                  | AL575509               | v-ets erythroblastosis virus E26 oncogene homolog 2 (avian)                 | 0.632       | 0.017   |
| LOC151162             | AL134724               | hypothetical LOC151162                                                      | 0.635       | 0.046   |
| TADA2B                | AI859834               | transcriptional adaptor 2 (ADA2 homolog, yeast)-beta                        | 0.635       | 0.001   |
| LTBP4                 | NM_003573              | latent transforming growth factor beta binding protein 4                    | 0.637       | 0.002   |
| AKR1C2                | M33376                 | aldo-keto reductase family 1, member C2                                     | 0.645       | 0.05    |
| PCDHGA1               | AK026188               | protocadherin gamma subfamily A, 1                                          | 0.645       | 0.002   |
| ETS2                  | NM_005239              | v-ets erythroblastosis virus E26 oncogene homolog 2 (avian)                 | 0.647       | 0.016   |
| SFRS14                | AV738039               | splicing factor, arginine/serine-rich 14                                    | 0.649       | 0.037   |
| SLC12A2               | AK025062               | solute carrier family 12 (sodium/potassium/chloride transporters), member 2 | 0.65        | 0.022   |
| LOC338799             | AW138760               | hypothetical LOC338799                                                      | 0.651       | 0.014   |
| HPGD                  | U63296                 | hydroxyprostaglandin dehydrogenase 15-(NAD)                                 | 0.651       | 0.031   |
| MAF                   | NM_005360              | v-maf musculoaponeurotic fibrosarcoma oncogene homolog (avian)              | 0.651       | 0.044   |
| EIF1B                 | NM_005875              | eukaryotic translation initiation factor 1B                                 | 0.658       | 0.015   |
| PDXDC1                | AK025504               | pyridoxal-dependent decarboxylase domain containing 1                       | 0.66        | 0.016   |
| SNW1                  | NM_012245              | SNW domain containing 1                                                     | 0.661       | 0.015   |

MTV, metabolic tumor volume.

**Supplementary Table 3.** Significantly Upregulated Canonical Pathways in MTV<sub>2.5</sub> High Tumor Samples

| Canonical pathways                                     | -log(p-value) | Ratio    | z-score | Molecules                                              |
|--------------------------------------------------------|---------------|----------|---------|--------------------------------------------------------|
| B Cell Development                                     | 4.53E+00      | 1.11E-01 | NaN     | HLA-DQA1, IGL, IGHM, IGHD                              |
| Hepatic Fibrosis/Hepatic Stellate Cell Activation      | 4.39E+00      | 3.74E-02 | NaN     | MET, COL12A1, IGFBP3, COL10A1, MYH11, COL11A1, COL17A1 |
| Hematopoiesis from Pluripotent Stem Cells              | 4.03E+00      | 8.33E-02 | NaN     | IGL, IGHM, IGHG1, IGHD                                 |
| Primary Immunodeficiency Signaling                     | 4.00E+00      | 8.16E-02 | NaN     | IGL, IGHM, IGHG1, IGHD                                 |
| LXR/RXR Activation                                     | 3.47E+00      | 4.13E-02 | NaN     | APOL1, SCD, LYZ, LPL, PTGS2                            |
| Caveolar-mediated Endocytosis Signaling                | 3.37E+00      | 5.63E-02 | NaN     | CD55, INS, ACTG2, ITGB6                                |
| GP6 Signaling Pathway                                  | 3.27E+00      | 3.73E-02 | 2.236   | LAMB3, COL12A1, COL10A1, COL11A1, COL17A1              |
| Clathrin-mediated Endocytosis Signaling                | 3.24E+00      | 2.90E-02 | NaN     | APOL1, MET, LYZ, INS, ACTG2, ITGB6                     |
| Inhibition of Matrix Metalloproteases                  | 3.03E+00      | 7.69E-02 | NaN     | SDC1, MMP28, MMP11                                     |
| IL-7 Signaling Pathway                                 | 2.97E+00      | 4.40E-02 | 2       | MET, SLC2A1, IGHM, IGHG1                               |
| Tight Junction Signaling                               | 2.84E+00      | 2.99E-02 | NaN     | CLDN1, MYLK, NECTIN1, ACTG2, MYH11                     |
| Glucocorticoid Receptor Signaling                      | 2.79E+00      | 2.03E-02 | NaN     | KRT13, KRT17, KRT23, HSPA1A/HSPA1B, KRT6A, PTGS2, PLAU |
| p53 Signaling                                          | 2.65E+00      | 3.60E-02 | NaN     | CDKN2A, TP63, TRIM29, SFN                              |
| Agranulocyte Adhesion and Diapedesis                   | 2.56E+00      | 2.59E-02 | NaN     | MMP28, CLDN1, MMP11, ACTG2, MYH11                      |
| HIF1 $\alpha$ Signaling                                | 2.47E+00      | 3.23E-02 | NaN     | MMP28, SLC2A1, EGLN3, MMP11                            |
| FXR/RXR Activation                                     | 2.45E+00      | 3.17E-02 | NaN     | APOL1, SDC1, INS, LPL                                  |
| Atherosclerosis Signaling                              | 2.44E+00      | 3.15E-02 | NaN     | APOL1, LYZ, LPL, COL10A1                               |
| Epithelial Adherens Junction Signaling                 | 2.18E+00      | 2.67E-02 | NaN     | MET, NECTIN1, ACTG2, MYH11                             |
| Macropinocytosis Signaling                             | 2.04E+00      | 3.45E-02 | NaN     | MET, INS, ITGB6                                        |
| Renal Cell Carcinoma Signaling                         | 2.02E+00      | 3.41E-02 | NaN     | MET, SLC2A1, EGLN3                                     |
| Alanine Degradation III                                | 2.01E+00      | 5.00E-01 | NaN     | GPT2                                                   |
| Alanine Biosynthesis II                                | 2.01E+00      | 5.00E-01 | NaN     | GPT2                                                   |
| Cysteine Biosynthesis/Homocysteine Degradation         | 2.01E+00      | 5.00E-01 | NaN     | CBS/CBSL                                               |
| Glutamine Degradation I                                | 2.01E+00      | 5.00E-01 | NaN     | GLS2                                                   |
| Bladder Cancer Signaling                               | 1.94E+00      | 3.19E-02 | NaN     | CDKN2A, MMP28, MMP11                                   |
| Communication between Innate and Adaptive Immune Cells | 1.93E+00      | 3.16E-02 | NaN     | IGHM, IGHG1, IGHD                                      |
| Granulocyte Adhesion and Diapedesis                    | 1.90E+00      | 2.21E-02 | NaN     | SDC1, MMP28, CLDN1, MMP11                              |
| ILK Signaling                                          | 1.78E+00      | 2.03E-02 | NaN     | ACTG2, MYH11, PTGS2, ITGB6                             |
| Retinol Biosynthesis                                   | 1.74E+00      | 4.76E-02 | NaN     | DHRS9, LPL                                             |
| Proline Biosynthesis I                                 | 1.71E+00      | 2.50E-01 | NaN     | PYCR2                                                  |
| Virus Entry via Endocytic Pathways                     | 1.70E+00      | 2.59E-02 | NaN     | CD55, ACTG2, ITGB6                                     |
| Osteoarthritis Pathway                                 | 1.68E+00      | 1.89E-02 | 1       | SPP1, H19, COL10A1, PTGS2                              |
| Leukocyte Extravasation Signaling                      | 1.68E+00      | 1.90E-02 | NaN     | MMP28, CLDN1, MMP11, ACTG2                             |
| HGF Signaling                                          | 1.67E+00      | 2.52E-02 | NaN     | MET, CDKN2A, PTGS2                                     |
| Integrin Signaling                                     | 1.63E+00      | 1.83E-02 | 0       | MYLK, ACTG2, TNK2, ITGB6                               |
| Autoimmune Thyroid Disease Signaling                   | 1.63E+00      | 4.17E-02 | NaN     | HLA-DQA1, IGHG1                                        |
| Cell Cycle: G2/M DNA Damage Checkpoint Regulation      | 1.60E+00      | 4.00E-02 | NaN     | CDKN2A, SFN                                            |
| Cellular Effects of Sildenafil (Viagra)                | 1.56E+00      | 2.29E-02 | NaN     | MYLK, ACTG2, MYH11                                     |
| Actin Cytoskeleton Signaling                           | 1.54E+00      | 1.72E-02 | NaN     | INS, MYLK, ACTG2, MYH11                                |
| Proline Biosynthesis II (from Arginine)                | 1.53E+00      | 1.67E-01 | NaN     | PYCR2                                                  |

Supplementary Table 3. Continued

| Canonical pathways                                               | $-\log(p\text{-value})$ | Ratio    | z-score | Molecules                |
|------------------------------------------------------------------|-------------------------|----------|---------|--------------------------|
| Arginine Degradation VI (Arginase 2 Pathway)                     | 1.53E+00                | 1.67E-01 | NaN     | PYCR2                    |
| Tryptophan Degradation to 2-amino-3-carboxymuconate Semialdehyde | 1.41E+00                | 1.25E-01 | NaN     | KYNU                     |
| PXR/RXR Activation                                               | 1.39E+00                | 3.08E-02 | NaN     | SCD, INS                 |
| Prostanoid Biosynthesis                                          | 1.36E+00                | 1.11E-01 | NaN     | PTGS2                    |
| Citrulline Biosynthesis                                          | 1.36E+00                | 1.11E-01 | NaN     | GLS2                     |
| Remodeling of Epithelial Adherens Junctions                      | 1.34E+00                | 2.90E-02 | NaN     | MET, ACTG2               |
| Cdc42 Signaling                                                  | 1.30E+00                | 1.80E-02 | NaN     | HLA-DQA1, MYLK, TNK2     |
| Myc Mediated Apoptosis Signaling                                 | 1.26E+00                | 2.63E-02 | NaN     | CDKN2A, SFN              |
| VDR/RXR Activation                                               | 1.24E+00                | 2.56E-02 | NaN     | SPP1, IGFBP3             |
| Oleate Biosynthesis II (Animals)                                 | 1.20E+00                | 7.69E-02 | NaN     | SCD                      |
| Sertoli Cell-Sertoli Cell Junction Signaling                     | 1.20E+00                | 1.63E-02 | NaN     | CLDN1, NECTIN1, ACTG2    |
| Allograft Rejection Signaling                                    | 1.18E+00                | 2.35E-02 | NaN     | HLA-DQA1, IGHG1          |
| Dendritic Cell Maturation                                        | 1.15E+00                | 1.55E-02 | NaN     | HLA-DQA1, COL10A1, IGHG1 |
| B Cell Receptor Signaling                                        | 1.15E+00                | 1.55E-02 | NaN     | IGHM, IGHG1, IGHD        |
| NAD biosynthesis II (from tryptophan)                            | 1.14E+00                | 6.67E-02 | NaN     | KYNU                     |
| Superpathway of Citrulline Metabolism                            | 1.14E+00                | 6.67E-02 | NaN     | GLS2                     |
| Regulation of Actin-based Motility by Rho                        | 1.14E+00                | 2.22E-02 | NaN     | MYLK, ACTG2              |
| Altered T Cell and B Cell Signaling in Rheumatoid Arthritis      | 1.14E+00                | 2.22E-02 | NaN     | SPP1, HLA-DQA1           |
| IL-17 Signaling                                                  | 1.13E+00                | 2.20E-02 | NaN     | CRP, PTGS2               |
| Vitamin-C Transport                                              | 1.12E+00                | 6.25E-02 | NaN     | SLC2A1                   |
| Gap Junction Signaling                                           | 1.11E+00                | 1.49E-02 | NaN     | SP3, ACTG2, GJB2         |
| DNA damage-induced 14-3-3 $\beta$ Signaling                      | 1.05E+00                | 5.26E-02 | NaN     | SFN                      |
| PPAR Signaling                                                   | 1.05E+00                | 1.98E-02 | NaN     | INS, PTGS2               |
| The Visual Cycle                                                 | 1.03E+00                | 5.00E-02 | NaN     | DHRS9                    |
| Maturity Onset Diabetes of Young (MODY) Signaling                | 1.01E+00                | 4.76E-02 | NaN     | INS                      |
| VEGF Signaling                                                   | 9.94E-01                | 1.83E-02 | NaN     | ACTG2, SFN               |
| Fatty Acid $\beta$ -oxidation                                    | 9.86E-01                | 4.55E-02 | NaN     | PTGS2                    |
| Type I Diabetes Mellitus Signaling                               | 9.81E-01                | 1.80E-02 | NaN     | INS, HLA-DQA1            |
| IGF-1 Signaling                                                  | 9.74E-01                | 1.79E-02 | NaN     | IGFBP3, SFN              |
| Systemic Lupus Erythematosus Signaling                           | 9.64E-01                | 1.29E-02 | NaN     | IGL, IGHM, IGHG1         |
| Cysteine Biosynthesis III (mammalia)                             | 9.50E-01                | 4.17E-02 | NaN     | CBS/CBSL                 |
| Bupropion Degradation                                            | 9.33E-01                | 4.00E-02 | NaN     | CYP1B1                   |
| Tryptophan Degradation III (Eukaryotic)                          | 9.33E-01                | 4.00E-02 | NaN     | KYNU                     |
| Paxillin Signaling                                               | 9.31E-01                | 1.68E-02 | NaN     | ACTG2, ITGB6             |
| Pancreatic Adenocarcinoma Signaling                              | 9.25E-01                | 1.67E-02 | NaN     | CDKN2A, PTGS2            |
| Neuroprotective Role of THOP1 in Alzheimer's Disease             | 9.25E-01                | 1.67E-02 | NaN     | FAP, PRSS3               |
| RhoA Signaling                                                   | 9.02E-01                | 1.61E-02 | NaN     | MYLK, ACTG2              |
| Signaling by Rho Family GTPases                                  | 8.89E-01                | 1.19E-02 | NaN     | MYLK, ACTG2, DES         |
| Colorectal Cancer Metastasis Signaling                           | 8.82E-01                | 1.18E-02 | NaN     | MMP28, MMP11, PTGS2      |
| PI3K/AKT Signaling                                               | 8.63E-01                | 1.53E-02 | NaN     | PTGS2, SFN               |
| Acetone Degradation I (to Methylglyoxal)                         | 8.60E-01                | 3.33E-02 | NaN     | CYP1B1                   |
| Adipogenesis pathway                                             | 8.47E-01                | 1.49E-02 | NaN     | LPL, FABP4               |
| G Protein Signaling Mediated by Tubby                            | 8.34E-01                | 3.12E-02 | NaN     | INS                      |

**Supplementary Table 3.** Continued

| Canonical pathways                                                    | $-\log(p\text{-value})$ | Ratio    | z-score | Molecules             |
|-----------------------------------------------------------------------|-------------------------|----------|---------|-----------------------|
| Aryl Hydrocarbon Receptor Signaling                                   | 8.12E-01                | 1.42E-02 | NaN     | CDKN2A, CYP1B1        |
| DNA Methylation and Transcriptional Repression Signaling              | 8.09E-01                | 2.94E-02 | NaN     | HIST1H4L              |
| Inhibition of Angiogenesis by TSP1                                    | 8.09E-01                | 2.94E-02 | NaN     | SDC1                  |
| Retinoate Biosynthesis I                                              | 8.09E-01                | 2.94E-02 | NaN     | DHRS9                 |
| Coagulation System                                                    | 7.98E-01                | 2.86E-02 | NaN     | PLAU                  |
| MIF-mediated Glucocorticoid Regulation                                | 7.98E-01                | 2.86E-02 | NaN     | PTGS2                 |
| IL-12 Signaling and Production in Macrophages                         | 7.88E-01                | 1.37E-02 | NaN     | APOL1, LYZ            |
| Ethanol Degradation II                                                | 7.76E-01                | 2.70E-02 | NaN     | DHRS9                 |
| Superpathway of Methionine Degradation                                | 7.76E-01                | 2.70E-02 | NaN     | CBS/CBSL              |
| Complement System                                                     | 7.76E-01                | 2.70E-02 | NaN     | CD55                  |
| Ovarian Cancer Signaling                                              | 7.70E-01                | 1.33E-02 | NaN     | CDKN2A, PTGS2         |
| Antigen Presentation Pathway                                          | 7.65E-01                | 2.63E-02 | NaN     | HLA-DQA1              |
| Oncostatin M Signaling                                                | 7.45E-01                | 2.50E-02 | NaN     | PLAU                  |
| Noradrenaline and Adrenaline Degradation                              | 7.45E-01                | 2.50E-02 | NaN     | DHRS9                 |
| Mechanisms of Viral Exit from Host Cells                              | 7.35E-01                | 2.44E-02 | NaN     | ACTG2                 |
| Estrogen Biosynthesis                                                 | 7.35E-01                | 2.44E-02 | NaN     | CYP1B1                |
| Hepatic Cholestasis                                                   | 7.27E-01                | 1.25E-02 | NaN     | INS, GCG              |
| Intrinsic Prothrombin Activation Pathway                              | 7.26E-01                | 2.38E-02 | NaN     | COL10A1               |
| MIF Regulation of Innate Immunity                                     | 7.17E-01                | 2.33E-02 | NaN     | PTGS2                 |
| Role of p14/p19ARF in Tumor Suppression                               | 7.17E-01                | 2.33E-02 | NaN     | CDKN2A                |
| Neuroinflammation Signaling Pathway                                   | 7.00E-01                | 9.65E-03 | NaN     | CRP, HLA-DQA1, PTGS2  |
| Aldosterone Signaling in Epithelial Cells                             | 6.95E-01                | 1.19E-02 | NaN     | HSPA1A/HSPA1B, DNAJB1 |
| Role of Oct4 in Mammalian Embryonic Stem Cell Pluripotency            | 6.90E-01                | 2.17E-02 | NaN     | SPP1                  |
| Graft-versus-Host Disease Signaling                                   | 6.74E-01                | 2.08E-02 | NaN     | HLA-DQA1              |
| Acute Phase Response Signaling                                        | 6.65E-01                | 1.14E-02 | NaN     | CRP, CP               |
| Semaphorin Signaling in Neurons                                       | 6.36E-01                | 1.89E-02 | NaN     | MET                   |
| PPAR $\alpha$ /RXR $\alpha$ Activation                                | 6.30E-01                | 1.08E-02 | NaN     | INS, LPL              |
| Transcriptional Regulatory Network in Embryonic Stem Cells            | 6.29E-01                | 1.85E-02 | NaN     | HIST1H4L              |
| Triacylglycerol Degradation                                           | 6.29E-01                | 1.85E-02 | NaN     | LPL                   |
| Cancer Drug Resistance By Drug Efflux                                 | 6.22E-01                | 1.82E-02 | NaN     | PTGS2                 |
| RAR Activation                                                        | 6.17E-01                | 1.05E-02 | NaN     | DHRS9, IGFBP3         |
| Nicotine Degradation III                                              | 6.15E-01                | 1.79E-02 | NaN     | CYP1B1                |
| Unfolded protein response                                             | 6.15E-01                | 1.79E-02 | NaN     | HSPA1A/HSPA1B         |
| Production of Nitric Oxide and Reactive Oxygen Species in Macrophages | 6.04E-01                | 1.03E-02 | NaN     | APOL1, LYZ            |
| Nur77 Signaling in T Lymphocytes                                      | 5.96E-01                | 1.69E-02 | NaN     | HLA-DQA1              |
| NRF2-mediated Oxidative Stress Response                               | 5.88E-01                | 1.01E-02 | NaN     | ACTG2, DNAJB1         |
| Adrenomedullin Signaling Pathway                                      | 5.85E-01                | 1.00E-02 | NaN     | ADM, MYLK             |
| Melanoma Signaling                                                    | 5.83E-01                | 1.64E-02 | NaN     | CDKN2A                |
| 3-phosphoinositide Biosynthesis                                       | 5.82E-01                | 9.95E-03 | NaN     | MET, CILP             |
| Calcium Signaling                                                     | 5.67E-01                | 9.71E-03 | NaN     | TP63, MYH11           |
| Melatonin Degradation I                                               | 5.60E-01                | 1.54E-02 | NaN     | CYP1B1                |
| Nicotine Degradation II                                               | 5.60E-01                | 1.54E-02 | NaN     | CYP1B1                |
| Calcium-induced T Lymphocyte Apoptosis                                | 5.54E-01                | 1.52E-02 | NaN     | HLA-DQA1              |

**Supplementary Table 3.** Continued

| Canonical pathways                                                              | $-\log(p\text{-value})$ | Ratio    | z-score | Molecules             |
|---------------------------------------------------------------------------------|-------------------------|----------|---------|-----------------------|
| Cell Cycle: G1/S Checkpoint Regulation                                          | 5.48E-01                | 1.49E-02 | NaN     | CDKN2A                |
| Eicosanoid Signaling                                                            | 5.48E-01                | 1.49E-02 | NaN     | PTGS2                 |
| AMPK Signaling                                                                  | 5.39E-01                | 9.26E-03 | NaN     | SLC2A1, INS           |
| Role of IL-17A in Arthritis                                                     | 5.38E-01                | 1.45E-02 | NaN     | PTGS2                 |
| Superpathway of Melatonin Degradation                                           | 5.32E-01                | 1.43E-02 | NaN     | CYP1B1                |
| ERK5 Signaling                                                                  | 5.22E-01                | 1.39E-02 | NaN     | SFN                   |
| MSP-RON Signaling Pathway                                                       | 5.22E-01                | 1.39E-02 | NaN     | ACTG2                 |
| T Helper Cell Differentiation                                                   | 5.17E-01                | 1.37E-02 | NaN     | HLA-DQA1              |
| GPCR-Mediated Integration of Enteroendocrine Signaling Exemplified by an L Cell | 5.17E-01                | 1.37E-02 | NaN     | GCG                   |
| EIF2 Signaling                                                                  | 5.10E-01                | 8.81E-03 | NaN     | INS, ACTG2            |
| Agrin Interactions at Neuromuscular Junction                                    | 5.08E-01                | 1.33E-02 | NaN     | ACTG2                 |
| Glioma Invasiveness Signaling                                                   | 5.03E-01                | 1.32E-02 | NaN     | PLAU                  |
| Serotonin Degradation                                                           | 4.98E-01                | 1.30E-02 | NaN     | DHRS9                 |
| Protein Kinase A Signaling                                                      | 4.97E-01                | 7.48E-03 | NaN     | MYLK, PTGS2, SFN      |
| Role of MAPK Signaling in the Pathogenesis of Influenza                         | 4.94E-01                | 1.28E-02 | NaN     | PTGS2                 |
| CD40 Signaling                                                                  | 4.89E-01                | 1.27E-02 | NaN     | PTGS2                 |
| Superpathway of Inositol Phosphate Compounds                                    | 4.87E-01                | 8.47E-03 | NaN     | MET, CILP             |
| Cyclins and Cell Cycle Regulation                                               | 4.80E-01                | 1.23E-02 | NaN     | CDKN2A                |
| Non-Small Cell Lung Cancer Signaling                                            | 4.72E-01                | 1.20E-02 | NaN     | CDKN2A                |
| Growth Hormone Signaling                                                        | 4.63E-01                | 1.18E-02 | NaN     | IGFBP3                |
| Small Cell Lung Cancer Signaling                                                | 4.63E-01                | 1.18E-02 | NaN     | PTGS2                 |
| Leptin Signaling in Obesity                                                     | 4.59E-01                | 1.16E-02 | NaN     | INS                   |
| HIPPO signaling                                                                 | 4.55E-01                | 1.15E-02 | NaN     | SFN                   |
| Huntington's Disease Signaling                                                  | 4.55E-01                | 8.00E-03 | NaN     | HSPA1A/HSPA1B, DNAJB1 |
| Crosstalk between Dendritic Cells and Natural Killer Cells                      | 4.47E-01                | 1.12E-02 | NaN     | ACTG2                 |
| OX40 Signaling Pathway                                                          | 4.39E-01                | 1.10E-02 | NaN     | HLA-DQA1              |
| FGF Signaling                                                                   | 4.39E-01                | 1.10E-02 | NaN     | MET                   |
| Fc $\gamma$ 3 Receptor-mediated Phagocytosis in Macrophages and Monocytes       | 4.32E-01                | 1.08E-02 | NaN     | ACTG2                 |
| Death Receptor Signaling                                                        | 4.32E-01                | 1.08E-02 | NaN     | ACTG2                 |
| TGF- $\beta$ Signaling                                                          | 4.32E-01                | 1.08E-02 | NaN     | INHBA                 |
| HER-2 Signaling in Breast Cancer                                                | 4.28E-01                | 1.06E-02 | NaN     | ITGB6                 |
| IL-4 Signaling                                                                  | 4.25E-01                | 1.05E-02 | NaN     | HLA-DQA1              |
| Protein Ubiquitination Pathway                                                  | 4.23E-01                | 7.55E-03 | NaN     | HSPA1A/HSPA1B, DNAJB1 |
| Sumoylation Pathway                                                             | 4.21E-01                | 1.04E-02 | NaN     | SP3                   |
| TR/RXR Activation                                                               | 4.14E-01                | 1.02E-02 | NaN     | SLC2A1                |
| FAK Signaling                                                                   | 3.91E-01                | 9.52E-03 | NaN     | ACTG2                 |
| Cholecystokinin/Gastrin-mediated Signaling                                      | 3.85E-01                | 9.35E-03 | NaN     | PTGS2                 |
| PAK Signaling                                                                   | 3.85E-01                | 9.35E-03 | NaN     | MYLK                  |
| Antioxidant Action of Vitamin C                                                 | 3.82E-01                | 9.26E-03 | NaN     | SLC2A1                |

Supplementary Table 3. Continued

| Canonical pathways                                                                | -log(p-value) | Ratio    | z-score | Molecules     |
|-----------------------------------------------------------------------------------|---------------|----------|---------|---------------|
| Chronic Myeloid Leukemia Signaling                                                | 3.70E-01      | 8.93E-03 | NaN     | CDKN2A        |
| GPCR-Mediated Nutrient Sensing in Enteroendocrine Cells                           | 3.70E-01      | 8.93E-03 | NaN     | GCG           |
| Glioma Signaling                                                                  | 3.48E-01      | 8.33E-03 | NaN     | CDKN2A        |
| G Beta Gamma Signaling                                                            | 3.48E-01      | 8.33E-03 | NaN     | CAV2          |
| iCOS-iCOSL Signaling in T Helper Cells                                            | 3.40E-01      | 8.13E-03 | NaN     | HLA-DQA1      |
| Role of Macrophages, Fibroblasts and Endothelial Cells<br>in Rheumatoid Arthritis | 3.27E-01      | 6.25E-03 | NaN     | IGHG1, PRSS3  |
| Phagosome Formation                                                               | 3.20E-01      | 7.63E-03 | NaN     | IGHG1         |
| CD28 Signaling in T Helper Cells                                                  | 3.18E-01      | 7.58E-03 | NaN     | HLA-DQA1      |
| IL-6 Signaling                                                                    | 3.13E-01      | 7.46E-03 | NaN     | CRP           |
| Th1 Pathway                                                                       | 3.11E-01      | 7.41E-03 | NaN     | HLA-DQA1      |
| CCR3 Signaling in Eosinophils                                                     | 3.09E-01      | 7.35E-03 | NaN     | MYLK          |
| 14-3-3-mediated Signaling                                                         | 3.06E-01      | 7.30E-03 | NaN     | SFN           |
| Androgen Signaling                                                                | 3.06E-01      | 7.30E-03 | NaN     | DNAJB1        |
| Iron homeostasis signaling pathway                                                | 3.06E-01      | 7.30E-03 | NaN     | CP            |
| p70S6K Signaling                                                                  | 3.04E-01      | 7.25E-03 | NaN     | SFN           |
| Corticotropin Releasing Hormone Signaling                                         | 3.02E-01      | 7.19E-03 | NaN     | PTGS2         |
| Human Embryonic Stem Cell Pluripotency                                            | 2.93E-01      | 6.99E-03 | NaN     | INHBA         |
| D-myo-inositol (1,4,5,6)-Tetrakisphosphate Biosynthesis                           | 2.91E-01      | 6.94E-03 | NaN     | CILP          |
| D-myo-inositol (3,4,5,6)-tetrakisphosphate Biosynthesis                           | 2.91E-01      | 6.94E-03 | NaN     | CILP          |
| Insulin Receptor Signaling                                                        | 2.85E-01      | 6.80E-03 | NaN     | INS           |
| Hereditary Breast Cancer Signaling                                                | 2.79E-01      | 6.67E-03 | NaN     | SFN           |
| Th2 Pathway                                                                       | 2.79E-01      | 6.67E-03 | NaN     | HLA-DQA1      |
| Type II Diabetes Mellitus Signaling                                               | 2.72E-01      | 6.49E-03 | NaN     | INS           |
| 3-phosphoinositide Degradation                                                    | 2.64E-01      | 6.33E-03 | NaN     | CILP          |
| D-myo-inositol-5-phosphate Metabolism                                             | 2.57E-01      | 6.17E-03 | NaN     | CILP          |
| PKC $\delta$ Signaling in T Lymphocytes                                           | 2.52E-01      | 6.06E-03 | NaN     | HLA-DQA1      |
| Glioblastoma Multiforme Signaling                                                 | 2.47E-01      | 5.95E-03 | NaN     | CDKN2A        |
| Tec Kinase Signaling                                                              | 2.44E-01      | 5.88E-03 | NaN     | ACTG2         |
| eNOS Signaling                                                                    | 2.40E-01      | 5.81E-03 | NaN     | HSPA1A/HSPA1B |
| Wnt/ $\beta$ -catenin Signaling                                                   | 2.40E-01      | 5.81E-03 | NaN     | CDKN2A        |
| RhoGDI Signaling                                                                  | 2.33E-01      | 5.65E-03 | NaN     | ACTG2         |
| Germ Cell-Sertoli Cell Junction Signaling                                         | 2.29E-01      | 5.59E-03 | NaN     | ACTG2         |
| Th1 and Th2 Activation Pathway                                                    | 2.21E-01      | 5.41E-03 | NaN     | HLA-DQA1      |
| NF- $\kappa$ B Signaling                                                          | 2.18E-01      | 5.35E-03 | NaN     | INS           |
| Role of NFAT in Regulation of the Immune Response                                 | 2.11E-01      | 5.21E-03 | NaN     | HLA-DQA1      |
| Regulation of the Epithelial-Mesenchymal Transition Pathway                       | 2.07E-01      | 5.13E-03 | NaN     | MET           |
| Endothelin-1 Signaling                                                            | 2.06E-01      | 5.10E-03 | NaN     | PTGS2         |
| IL-8 Signaling                                                                    | 0.00E+00      | 4.93E-03 | NaN     | PTGS2         |
| mTOR Signaling                                                                    | 0.00E+00      | 4.83E-03 | NaN     | INS           |
| Thrombin Signaling                                                                | 0.00E+00      | 4.76E-03 | NaN     | MYLK          |
| LPS/IL-1 Mediated Inhibition of RXR Function                                      | 0.00E+00      | 4.50E-03 | NaN     | FABP4         |
| Axonal Guidance Signaling                                                         | 0.00E+00      | 4.38E-03 | NaN     | MET, MMP11    |



**Supplementary Table 3.** Continued

| Canonical pathways                                                        | -log(p-value) | Ratio    | z-score | Molecules |
|---------------------------------------------------------------------------|---------------|----------|---------|-----------|
| Role of Osteoblasts, Osteoclasts and Chondrocytes in Rheumatoid Arthritis | 0.00E+00      | 4.29E-03 | NaN     | SPP1      |
| Phospholipase C Signaling                                                 | 0.00E+00      | 4.10E-03 | NaN     | IGHG1     |
| Sirtuin Signaling Pathway                                                 | 0.00E+00      | 3.42E-03 | NaN     | SLC2A1    |
| Xenobiotic Metabolism Signaling                                           | 0.00E+00      | 3.38E-03 | NaN     | CYP1B1    |
| Molecular Mechanisms of Cancer                                            | 0.00E+00      | 2.54E-03 | NaN     | CDKN2A    |

MTV, metabolic tumor volume.

**Supplementary Table 4.** Upstream Analysis in MTV<sub>2,5</sub> High Tumor Samples

| Upstream regulator              | Molecule type                     | Predicted activation state | Activation z-score | p-value  |
|---------------------------------|-----------------------------------|----------------------------|--------------------|----------|
| IFNG                            | cytokine                          | Activated                  | 3.657              | 1.04E-12 |
| FGF2                            | growth factor                     | Activated                  | 3.221              | 2.25E-06 |
| JUN                             | transcription regulator           | Activated                  | 3.212              | 3.55E-07 |
| lipopolysaccharide              | chemical drug                     | Activated                  | 3.186              | 1.26E-10 |
| TNF                             | cytokine                          | Activated                  | 3.079              | 1.55E-12 |
| HGF                             | growth factor                     | Activated                  | 2.903              | 1.79E-04 |
| IL1B                            | cytokine                          | Activated                  | 2.794              | 6.13E-12 |
| RELA                            | transcription regulator           | Activated                  | 2.754              | 4.82E-05 |
| Cg                              | complex                           | Activated                  | 2.638              | 2.12E-07 |
| IL5                             | cytokine                          | Activated                  | 2.611              | 4.76E-04 |
| Insulin                         | group                             | Activated                  | 2.547              | 2.83E-03 |
| SP1                             | transcription regulator           | Activated                  | 2.49               | 1.01E-07 |
| tretinoin                       | chemical - endogenous mammalian   | Activated                  | 2.474              | 1.57E-06 |
| PPARG                           | ligand-dependent nuclear receptor | Activated                  | 2.454              | 1.04E-08 |
| STAT1                           | transcription regulator           | Activated                  | 2.449              | 1.68E-03 |
| ARNT2                           | transcription regulator           | Activated                  | 2.449              | 5.54E-04 |
| OSM                             | cytokine                          | Activated                  | 2.433              | 1.62E-02 |
| FOS                             | transcription regulator           | Activated                  | 2.429              | 3.56E-04 |
| Akt                             | group                             | Activated                  | 2.42               | 4.66E-04 |
| mycophenolic acid               | chemical drug                     | Activated                  | 2.412              | 3.86E-06 |
| tributyryn                      | chemical drug                     | Activated                  | 2.407              | 7.90E-07 |
| AGT                             | growth factor                     | Activated                  | 2.402              | 2.11E-06 |
| BMP4                            | growth factor                     | Activated                  | 2.383              | 5.03E-05 |
| Tgf beta                        | group                             | Activated                  | 2.364              | 3.73E-07 |
| bucladesine                     | chemical toxicant                 | Activated                  | 2.315              | 9.49E-04 |
| EGFR                            | kinase                            | Activated                  | 2.26               | 2.72E-05 |
| EGF                             | growth factor                     | Activated                  | 2.255              | 7.75E-06 |
| SIM1                            | transcription regulator           | Activated                  | 2.236              | 3.95E-03 |
| FN1                             | enzyme                            | Activated                  | 2.219              | 3.64E-03 |
| PRL                             | cytokine                          | Activated                  | 2.213              | 2.29E-03 |
| NFkB (complex)                  | complex                           | Activated                  | 2.208              | 2.80E-04 |
| cis-urocanic acid               | chemical drug                     | Activated                  | 2.207              | 6.37E-08 |
| alitretinoin                    | chemical drug                     | Activated                  | 2.207              | 1.17E-04 |
| BMP2                            | growth factor                     | Activated                  | 2.2                | 3.28E-03 |
| CD40LG                          | cytokine                          | Activated                  | 2.187              | 7.26E-04 |
| 3,4,5,3',4'-pentachlorobiphenyl | chemical toxicant                 | Activated                  | 2.186              | 4.93E-05 |
| SREBF1                          | transcription regulator           | Activated                  | 2.178              | 2.47E-04 |
| MYD88                           | other                             | Activated                  | 2.168              | 9.93E-03 |
| Vegf                            | group                             | Activated                  | 2.164              | 7.30E-06 |
| PDGF BB                         | complex                           | Activated                  | 2.162              | 5.71E-07 |
| EDN1                            | cytokine                          | Activated                  | 2.162              | 2.95E-03 |
| NFKB1                           | transcription regulator           | Activated                  | 2.161              | 2.25E-03 |
| SMARCB1                         | transcription regulator           | Activated                  | 2.157              | 1.56E-03 |
| CTNNB1                          | transcription regulator           | Activated                  | 2.062              | 3.46E-08 |
| CEBPB                           | transcription regulator           | Activated                  | 2.042              | 1.38E-07 |
| TGFB1                           | growth factor                     | Activated                  | 2.038              | 1.41E-15 |
| IRS2                            | enzyme                            | Activated                  | 2                  | 4.82E-05 |
| HBEGF                           | growth factor                     | Activated                  | 2                  | 5.83E-05 |

MTV, metabolic tumor volume.

**Supplementary Table 5.** Predicted Diseases and Functions in MTV<sub>2.5</sub> High Tumor Samples

| Diseases or functions annotation                   | p-value  | Predicted activation state | Activation z-score |
|----------------------------------------------------|----------|----------------------------|--------------------|
| Invasion of tumor                                  | 1.36E-05 | Increased                  | 2.007              |
| Cell spreading                                     | 7.85E-05 | Increased                  | 2.017              |
| Proliferation of tumor cells                       | 7.14E-05 | Increased                  | 2.033              |
| Genital tumor                                      | 5.47E-06 | Increased                  | 2.039              |
| Quantity of carbohydrate                           | 1.99E-05 | Increased                  | 2.042              |
| Migration of tumor cells                           | 1.30E-06 | Increased                  | 2.066              |
| Activation of antigen presenting cells             | 4.04E-05 | Increased                  | 2.158              |
| Cell movement of pancreatic cancer cell lines      | 2.70E-05 | Increased                  | 2.2                |
| Metabolism of nucleotide                           | 9.56E-05 | Increased                  | 2.225              |
| Metabolism of nucleic acid component or derivative | 1.17E-04 | Increased                  | 2.225              |
| Survival of organism                               | 3.33E-07 | Increased                  | 2.275              |
| Binding of DNA                                     | 4.77E-05 | Increased                  | 2.355              |
| Invasion of tumor cell lines                       | 8.94E-08 | Increased                  | 2.387              |
| Cell viability                                     | 2.44E-07 | Increased                  | 2.402              |
| Invasion of tumor cells                            | 7.67E-05 | Increased                  | 2.414              |
| Metabolism of carbohydrate                         | 1.94E-05 | Increased                  | 2.628              |
| Organismal death                                   | 1.20E-06 | Decreased                  | -3.967             |
| Morbidity or mortality                             | 1.94E-07 | Decreased                  | -3.899             |
| Necrosis                                           | 5.32E-10 | Decreased                  | -3.65              |
| Cell death                                         | 7.02E-08 | Decreased                  | -3.081             |
| Inflammation of absolute anatomical region         | 2.62E-08 | Decreased                  | -2.906             |
| Apoptosis                                          | 1.99E-05 | Decreased                  | -2.763             |
| Cell death of tumor cell lines                     | 7.71E-08 | Decreased                  | -2.495             |
| Inflammation of organ                              | 5.50E-11 | Decreased                  | -2.328             |
| Apoptosis of tumor cell lines                      | 2.42E-07 | Decreased                  | -2.265             |
| Glomerulosclerosis                                 | 2.95E-05 | Decreased                  | -2.178             |
| Contraction of muscle cells                        | 8.39E-06 | Decreased                  | -2.172             |
| Inflammation of body cavity                        | 1.45E-07 | Decreased                  | -2.115             |

MTV, metabolic tumor volume.

**Supplementary Table 6.** Predicted Regulator Effects in MTV<sub>2,5</sub> High Tumor Samples

| ID | Consistency score | Regulators                         | Diseases & functions                                  | Known regulator-disease/function relationship |
|----|-------------------|------------------------------------|-------------------------------------------------------|-----------------------------------------------|
| 1  | 7.071             | FOS, MYD88, U0126                  | Invasion of tumor cells, Proliferation of tumor cells | 50% (3/6)                                     |
| 2  | 6.641             | FOS, IL1B, U0126                   | Invasion of tumor cells, Proliferation of tumor cells | 67% (4/6)                                     |
| 3  | 6.641             | IL1B, MYD88, U0126                 | Invasion of tumor, Proliferation of tumor cells       | 50% (3/6)                                     |
| 4  | 6.364             | CD40LG, MYD88, U0126               | Invasion of tumor, Proliferation of tumor cells       | 50% (3/6)                                     |
| 5  | 6.364             | EDN1, MYD88, U0126                 | Invasion of tumor, Proliferation of tumor cells       | 67% (4/6)                                     |
| 6  | 6.364             | actinomycin D, FOS, U0126          | Invasion of tumor cells, Proliferation of tumor cells | 67% (4/6)                                     |
| 7  | 6.01              | cycloheximide, FOS, U0126          | Invasion of tumor cells, Proliferation of tumor cells | 67% (4/6)                                     |
| 8  | 6.008             | CD40LG, IL1B, U0126                | Invasion of tumor, Proliferation of tumor cells       | 67% (4/6)                                     |
| 9  | 5.692             | IL1B, NFKB1, U0126                 | Invasion of tumor, Proliferation of tumor cells       | 50% (3/6)                                     |
| 10 | 5.5               | AGT, Tgf beta, U0126               | Invasion of tumor cells                               | 33% (1/3)                                     |
| 11 | 5.5               | HGF, Tgf beta, U0126               | Invasion of tumor cells                               | 67% (2/3)                                     |
| 12 | 5.5               | PDGF BB, Tgf beta, U0126           | Invasion of tumor cells                               | 33% (1/3)                                     |
| 13 | 5.5               | SB203580, Tgf beta, U0126          | Invasion of tumor cells                               | 33% (1/3)                                     |
| 14 | 5.5               | Tgf beta, tretinoin, U0126         | Invasion of tumor cells                               | 67% (2/3)                                     |
| 15 | 5.307             | EGFR, PD98059, TGFB1               | Invasion of tumor cells                               | 100% (3/3)                                    |
| 16 | 5.307             | EGFR, TGFB1, TNF                   | Invasion of tumor cells                               | 67% (2/3)                                     |
| 17 | 5.307             | PD98059, TGFB1, TNF                | Invasion of tumor cells                               | 67% (2/3)                                     |
| 18 | 5.307             | Tgf beta, TGFB1, U0126             | Invasion of tumor cells                               | 67% (2/3)                                     |
| 19 | 5                 | BMP2, Tgf beta, U0126              | Invasion of tumor cells                               | 67% (2/3)                                     |
| 20 | 5                 | RELA, Tgf beta, U0126              | Invasion of tumor cells                               | 33% (1/3)                                     |
| 21 | 5                 | Tgf beta, U0126, Vegf              | Invasion of tumor cells                               | 67% (2/3)                                     |
| 22 | 4.899             | EGF, EGFR, TGFB1                   | Invasion of tumor cells                               | 100% (3/3)                                    |
| 23 | 4.899             | EGF, PD98059, TGFB1                | Invasion of tumor cells                               | 100% (3/3)                                    |
| 24 | 4.899             | EGF, TGFB1, TNF                    | Invasion of tumor cells                               | 67% (2/3)                                     |
| 25 | 4.899             | EGFR, FGF2, TGFB1                  | Invasion of tumor cells                               | 67% (2/3)                                     |
| 26 | 4.899             | EGFR, FOS, TGFB1                   | Invasion of tumor cells                               | 67% (2/3)                                     |
| 27 | 4.899             | EGFR, JUN, TGFB1                   | Invasion of tumor cells                               | 67% (2/3)                                     |
| 28 | 4.899             | EGFR, TGFB1, tyrphostin AG 1478    | Invasion of tumor cells                               | 100% (3/3)                                    |
| 29 | 4.899             | FGF2, PD98059, TGFB1               | Invasion of tumor cells                               | 67% (2/3)                                     |
| 30 | 4.899             | FGF2, TGFB1, TNF                   | Invasion of tumor cells                               | 33% (1/3)                                     |
| 31 | 4.899             | FOS, PD98059, TGFB1                | Invasion of tumor cells                               | 67% (2/3)                                     |
| 32 | 4.899             | FOS, TGFB1, TNF                    | Invasion of tumor cells                               | 33% (1/3)                                     |
| 33 | 4.899             | JUN, PD98059, TGFB1                | Invasion of tumor cells                               | 67% (2/3)                                     |
| 34 | 4.899             | JUN, TGFB1, TNF                    | Invasion of tumor cells                               | 33% (1/3)                                     |
| 35 | 4.899             | PD98059, TGFB1, tyrphostin AG 1478 | Invasion of tumor cells                               | 100% (3/3)                                    |
| 36 | 4.899             | TGFB1, TNF, tyrphostin AG 1478     | Invasion of tumor cells                               | 67% (2/3)                                     |
| 37 | 4.491             | Cg, EGFR, TGFB1                    | Invasion of tumor cells                               | 67% (2/3)                                     |
| 38 | 4.491             | Cg, PD98059, TGFB1                 | Invasion of tumor cells                               | 67% (2/3)                                     |
| 39 | 4.491             | Cg, TGFB1, TNF                     | Invasion of tumor cells                               | 33% (1/3)                                     |
| 40 | 4.491             | EDN1, EGFR, TGFB1                  | Invasion of tumor cells                               | 100% (3/3)                                    |
| 41 | 4.491             | EDN1, PD98059, TGFB1               | Invasion of tumor cells                               | 100% (3/3)                                    |
| 42 | 4.491             | EDN1, TGFB1, TNF                   | Invasion of tumor cells                               | 67% (2/3)                                     |
| 43 | 4.491             | EGFR, GATA4, TGFB1                 | Invasion of tumor cells                               | 67% (2/3)                                     |

**Supplementary Table 6.** Continued

| ID | Consistency score | Regulators                | Diseases & functions                   | Known regulator-disease/function relationship |
|----|-------------------|---------------------------|----------------------------------------|-----------------------------------------------|
| 44 | 4.491             | GATA4, PD98059, TGFB1     | Invasion of tumor cells                | 67% (2/3)                                     |
| 45 | 4.491             | GATA4, TGFB1, TNF         | Invasion of tumor cells                | 33% (1/3)                                     |
| 46 | 4.359             | SP1, Tgf beta, U0126      | Genital tumor, Invasion of tumor cells | 17% (1/6)                                     |
| 47 | 4.264             | LY294002, Tgf beta, U0126 | Genital tumor, Invasion of tumor cells | 50% (3/6)                                     |
| 48 | 4.082             | EGFR, FN1, TGFB1          | Invasion of tumor cells                | 100% (3/3)                                    |
| 49 | 4.082             | FN1, PD98059, TGFB1       | Invasion of tumor cells                | 100% (3/3)                                    |
| 50 | 4.082             | FN1, TGFB1, TNF           | Invasion of tumor cells                | 67% (2/3)                                     |
| 51 | 0                 | SREBF1                    | Proliferation of tumor cells           | 100% (1/1)                                    |
| 52 | -3                | lipopolysaccharide        | Proliferation of tumor cells           | 100% (1/1)                                    |
| 53 | -3.78             | IFNG                      | Proliferation of tumor cells           | 100% (1/1)                                    |
| 54 | -4.899            | CTNNB1                    | Proliferation of tumor cells           | 100% (1/1)                                    |
| 55 | -7.506            | cis-urocanic acid         | Proliferation of tumor cells           | 0% (0/1)                                      |
| 56 | -8.083            | OSM                       | Proliferation of tumor cells           | 100% (1/1)                                    |
| 57 | -8.083            | PRL                       | Proliferation of tumor cells           | 100% (1/1)                                    |
| 58 | -8.083            | bucladesine               | Proliferation of tumor cells           | 0% (0/1)                                      |

MTV, metabolic tumor volume.

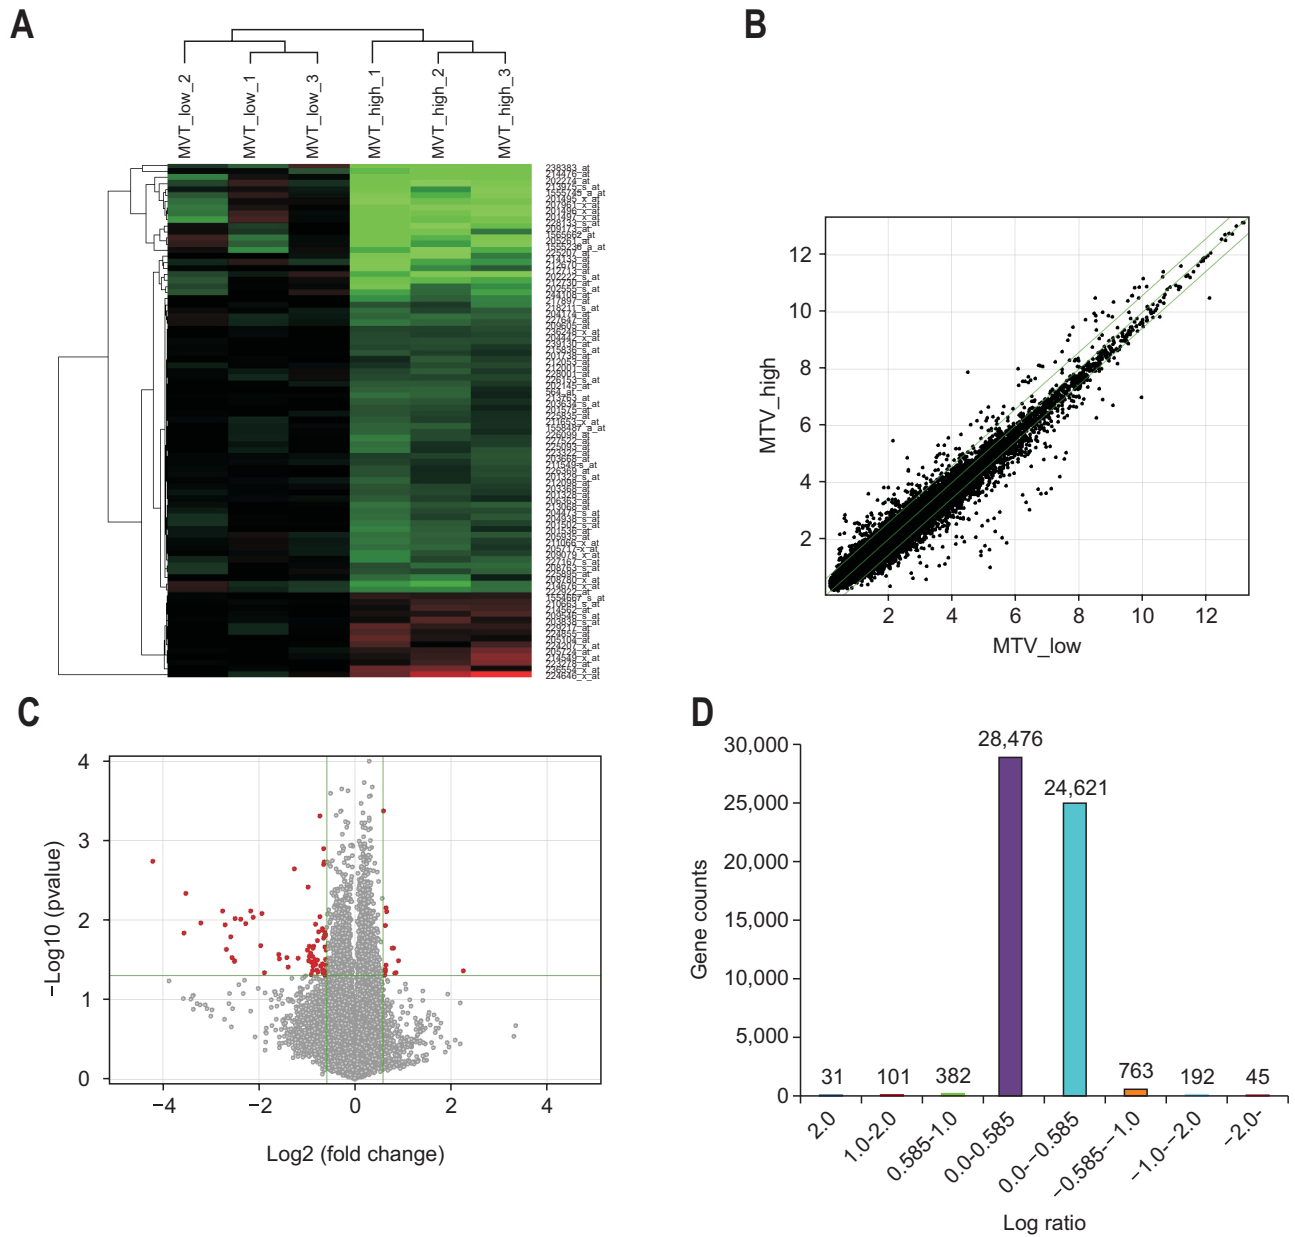

**Supplementary Fig. 1.** Differentially expressed genes according to metabolic phenotype (metabolic tumor volume [MTV] high;  $\text{MTV}_{2.5} \geq 4.5$  vs MTV low;  $\text{MTV}_{2.5} < 4.5$ ). (A) Heatmap of significant genes for MTV high and low groups. (B) Scatter plot for gene expression patterns in MTV high and low groups. (C) Volcano plot for significantly upregulated (fold change [FC]  $> 2$ ) and downregulated (FC  $< 2$ ) genes according to metabolic phenotype. (D) Distribution of fold changes in the relative expression of the MTV high group versus the MTV low group.

**Oncogene**  
 Relatively up-regulated genes of MTV high group compared to MTV low group (>2 folds)  
 (n=25)

**Tumor suppressor gene**  
 Relatively down-regulated genes of MTV high group compared to MTV low group (<0.5 folds)  
 (n=10)

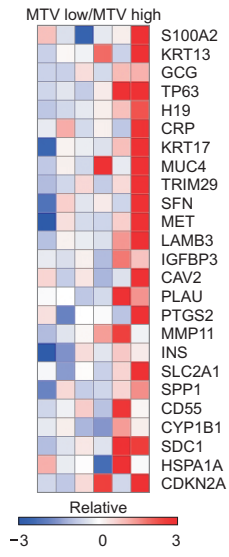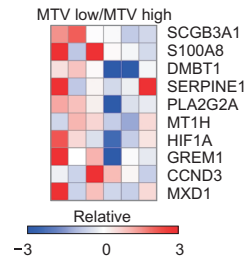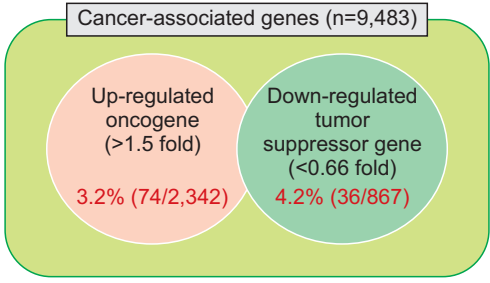

**Supplementary Fig. 2.** Relative gene expression between MTV high versus low–oncogene & tumor suppressor genes. MTV, metabolic tumor volume.

Proliferation-related gene  
(n=52)

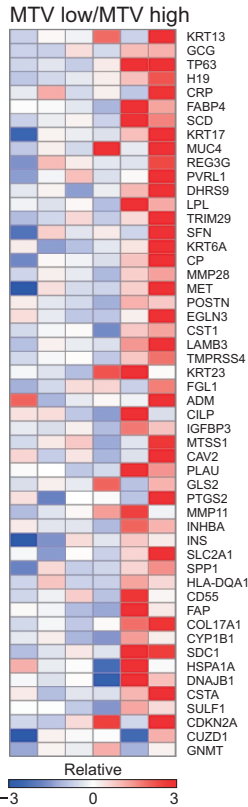

Tumor progression by  
up-regulation of  
proliferation-related genes (>1.5 fold)  
3.2% (160/5,039)

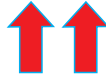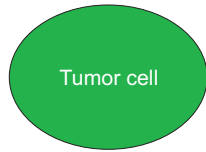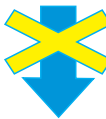

Inhibition of tumor apoptosis  
by down-regulation of  
apoptosis-related genes (<0.66 fold)  
4.0% (187/4,700)

Apoptosis-related gene  
(n=46)

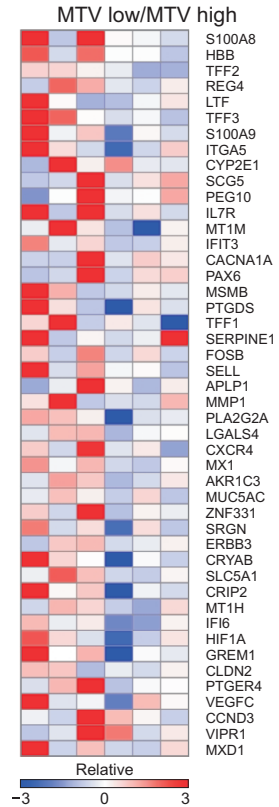

**Supplementary Fig. 3.** Relative gene expression between MTV high versus low–proliferation & apoptosis related genes. MTV, metabolic tumor volume.



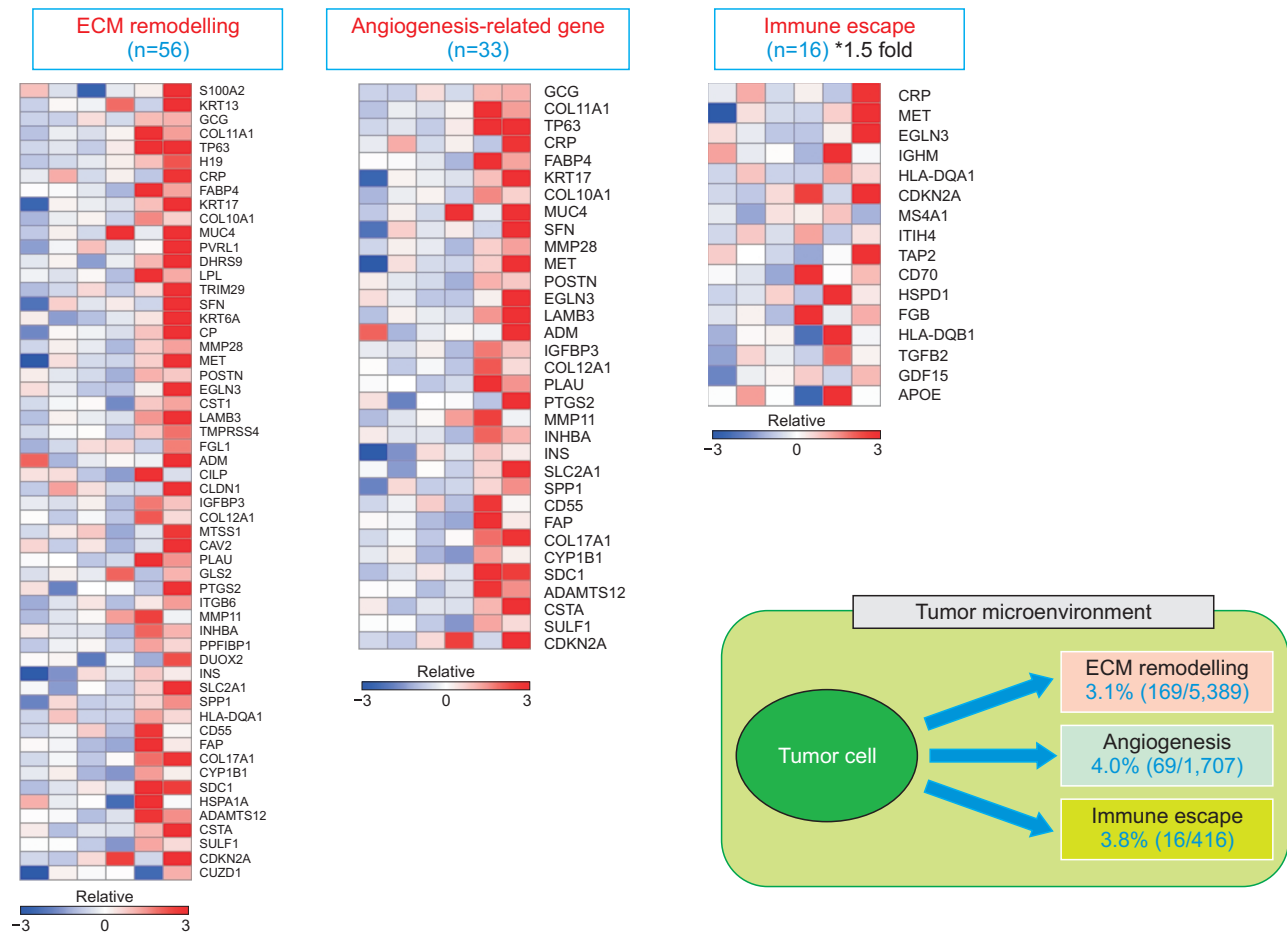

**Supplementary Fig. 4.** Relative gene expression between MTV high versus low-ECM & angiogenesis & immune escape-related genes.

**EMT & invasion-related gene**  
(n=33) \*1.5 fold

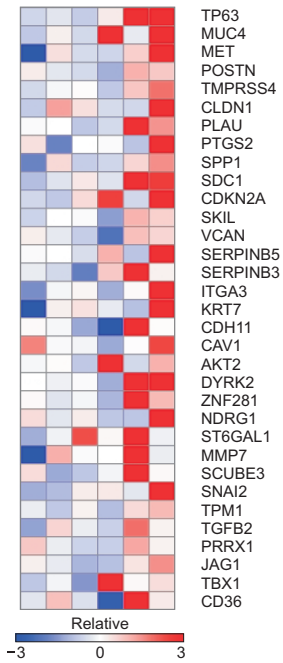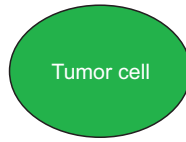

Up-regulation of  
EMT & invasion  
related gene  
5.7% (33/579)

Up-regulation of  
metastasis related  
gene  
4.3% (106/2,443)

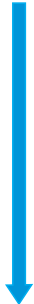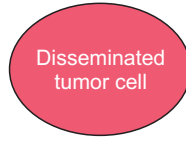

**Metastasis-related gene**  
(n=37)

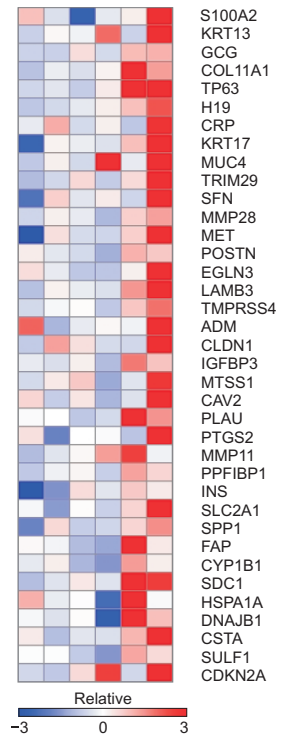

**Supplementary Fig. 5.** Relative gene expression between MTV high versus low- EMT & invasion & metastasis related genes. MTV, metabolic tumor volume.

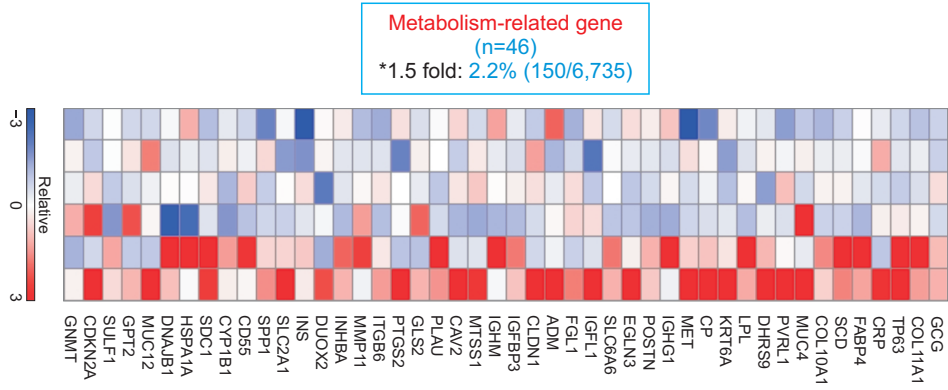

**Supplementary Fig. 6.** Relative gene expression between MTV high versus low-metabolism-related genes. MTV, metabolic tumor volume.
